# Supplementary material
Source: MDPI journal article supplement (https://www.mdpi.com/2036-7449/15/2/23)
Supplement: s1 [file s1]

Tabla S1. Seasonal index (SI) by month in Galicia from 2018 to 2021 (the values are expressed in relation to the unit, which represents the annual average).

| Month     | SI    |
|-----------|-------|
| January   | 1.188 |
| February  | 1.069 |
| March     | 1.133 |
| April     | 1.072 |
| May       | 0.965 |
| June      | 0.82  |
| July      | 0.589 |
| August    | 0.72  |
| September | 0.93  |
| October   | 0.992 |
| November  | 1.398 |
| December  | 1.122 |

Table S2. Mean values and standard deviation (SD) of the defined daily dose per 1000 inhabitants and day (DID) by year (2018-2021) in Galicia.

| Year | Mean DID | SD DID |
|------|----------|--------|
| 2018 | 1.016    | 1.016  |
| 2019 | 1.165    | 1.165  |
| 2020 | 1.273    | 1.273  |
| 2021 | 1.338    | 1.338  |
